# Supplementary material for: The Neuroprotective Effects of GPR4 Inhibition through the Attenuation of Caspase Mediated Apoptotic Cell Death in an MPTP Induced Mouse Model of Parkinson’s Disease
Source: MDPI journal article supplement (doi:10.3390/ijms22094674), 2021-04-28
Supplement: s1 [file s1]

(a)

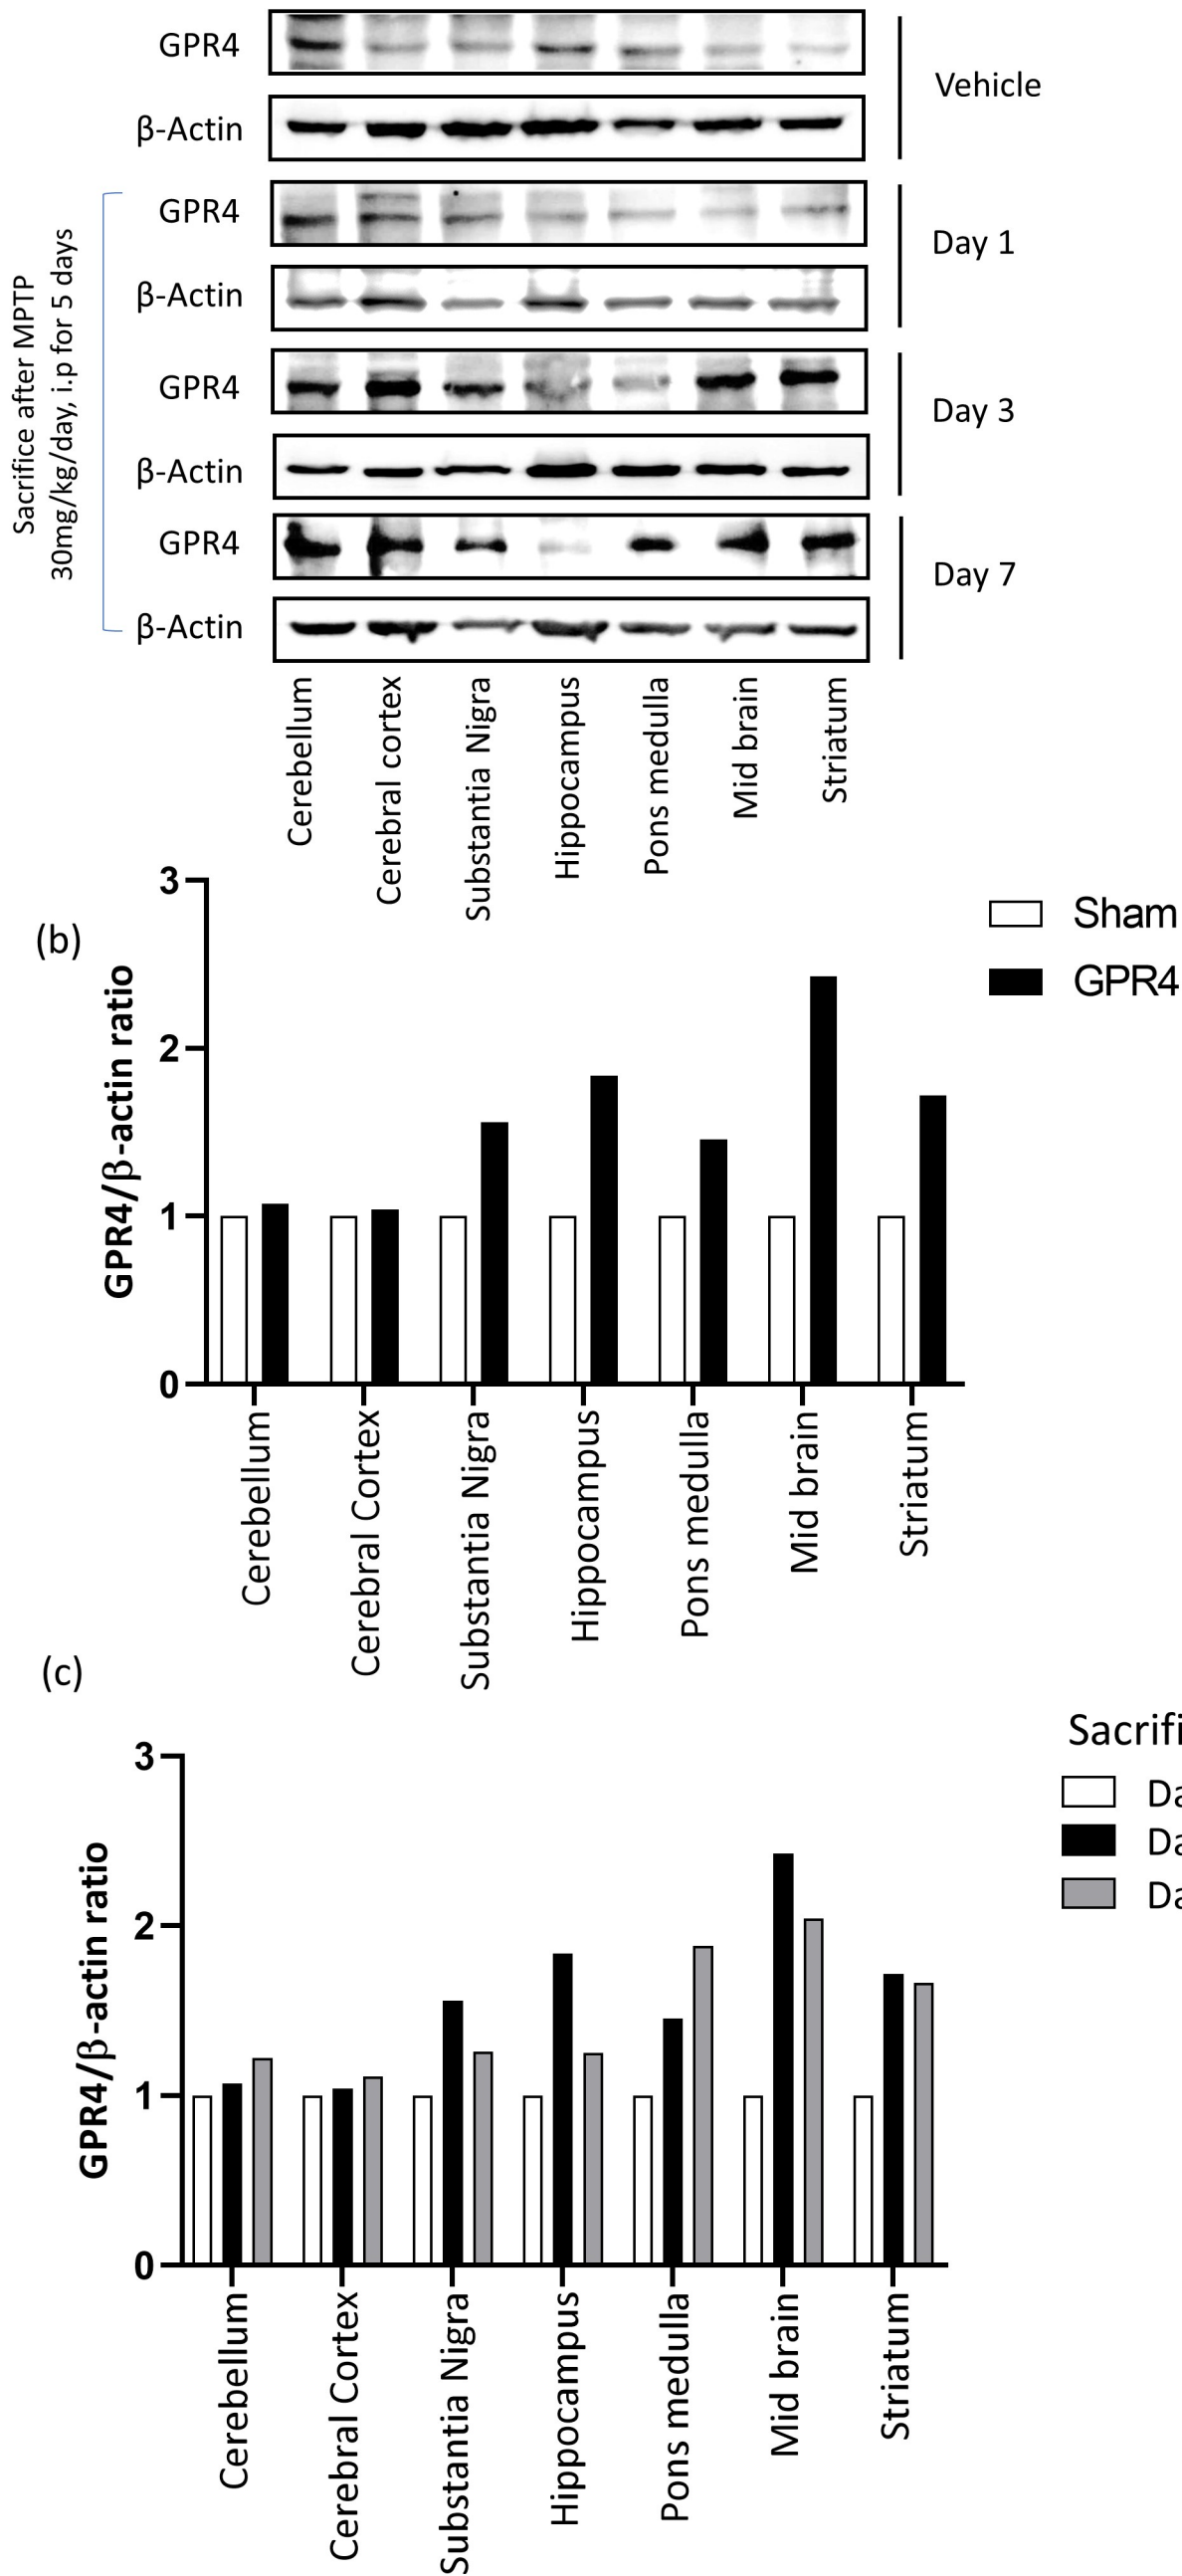

Supplementary figure S1: The effect of sub chronic administration MPTP, on the GPR4 Protein expression in different regions of mice brain. MPTP was treated (30mg/kg/day) for 5 days. Mice were sacrificed and tissue of different brain region was collected after 1, 3 and 7 days of last MPTP injection. (a). GPR4 protein expression in different regions of brain at different days after MPTP administration. (b). Densitometric analysis of the immunoblot data.  $\beta$  Actin were used as an internal control.
