# Supplementary material for: The Neuroprotective Effects of GPR4 Inhibition through the Attenuation of Caspase Mediated Apoptotic Cell Death in an MPTP Induced Mouse Model of Parkinson’s Disease
Source: MDPI journal article supplement (doi:10.3390/ijms22094674), 2021-04-28
Supplement: s1 [file s1]

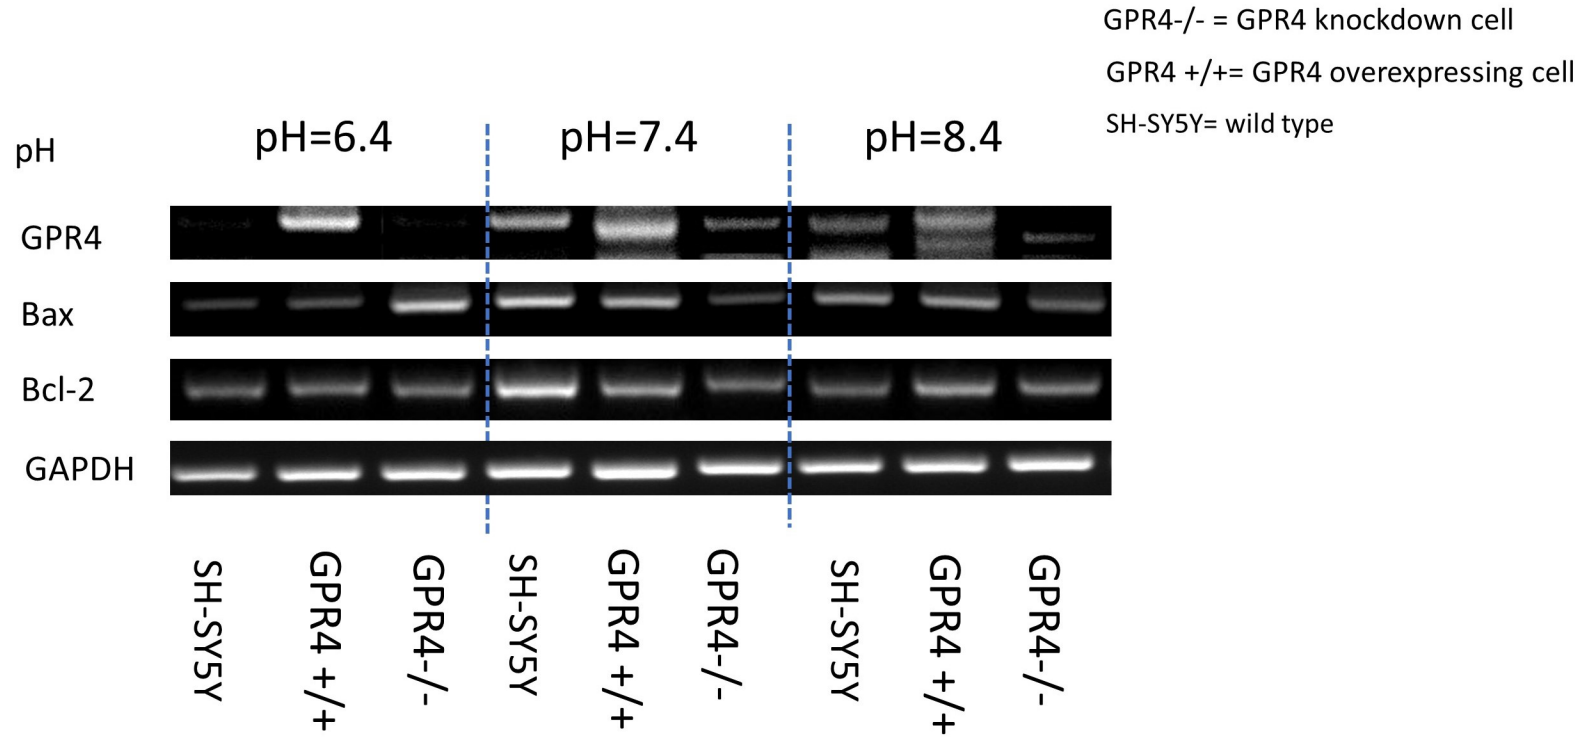

**Supplementary figure 2:** pH condition changes the expression level of GPR4 and the expression of apoptotic markers. mRNA expression level of GPR4 and Bax, Bcl-2 apoptotic markers in the SH-SY5Y. SH-SY5Y stably expressing GPR4 and GPR4 knocked out stable SH-SY5Y cells treated with different pH mediums for 6 hours. GAPDH was used as internal control.
